# Supplementary material
Source: MDPI journal article supplement (https://www.mdpi.com/2311-7524/8/9/768)
Supplement: s1 [file s1]

## Supplementary Materials

**Figure S1.** Locally available botanicals used against green mold pathogen of button mushroom under *in vitro* and *in vivo* condition.

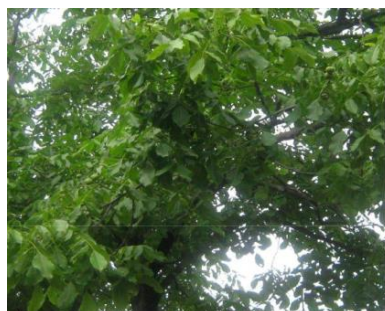

*Juglans regia*

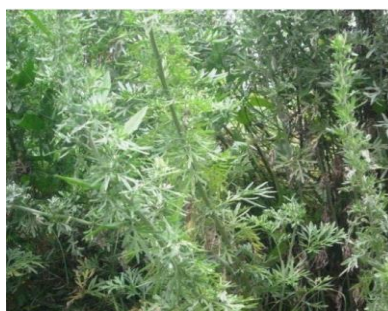

*Artemesia annua*

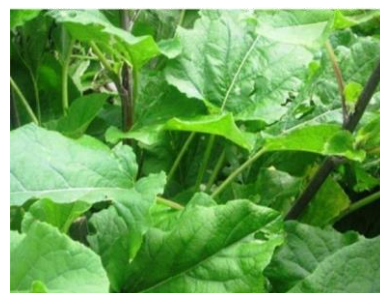

*Matricarias spp.*

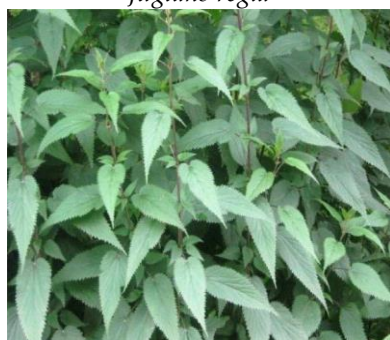

*Urtica dioica*

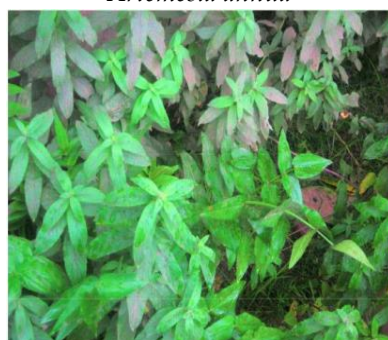

*Mentha longifolia*

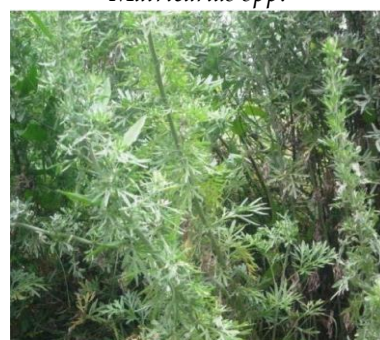

*Lavendula officinalis*

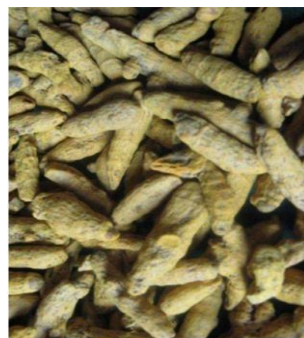

*Curcuma longa*

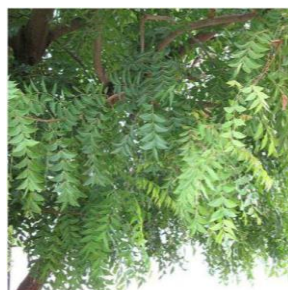

*Azadirachta indica*

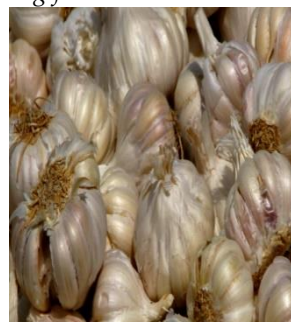

*Allium sativum*

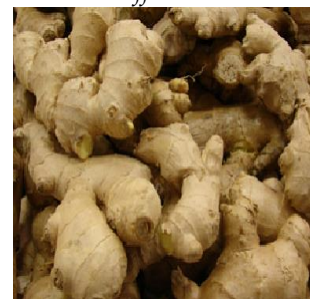

*Zingiber officinale*

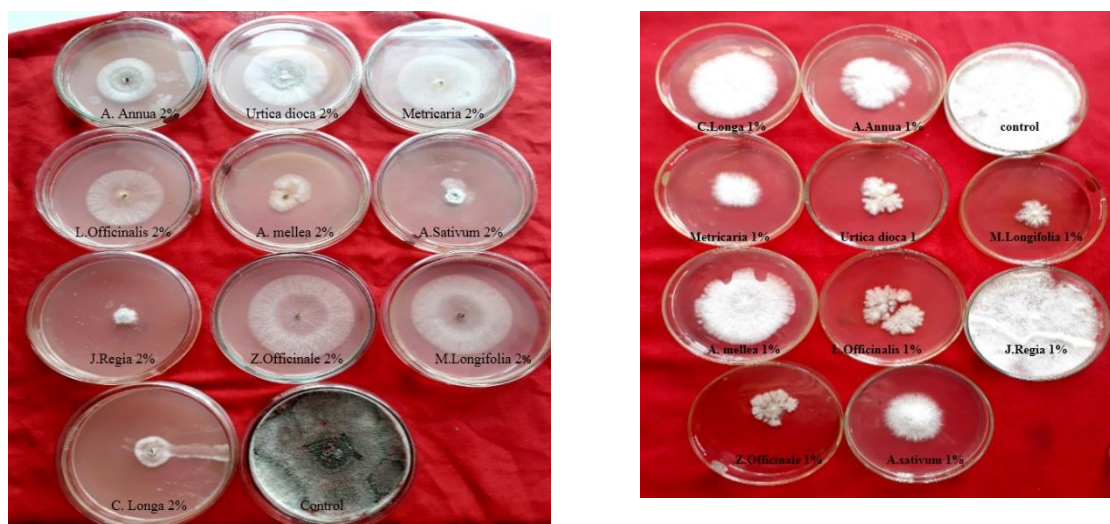

Botanicals evaluated against *Trichoderma harzianum*      Botanicals evaluated against *A. bisporus*

**Figure S2.** *In vitro* evaluation of ethanol extract of botanical against pathogen (*T. harizianum*) and host (*A. bisporus*)

Where: A. Annua = *Artemesia annua*, L.officinalis = *Levendulla officinalis*, A. Mellea = *Azadirachta mellea*, A. sativum = *Allium Sativum*, J. Regia = *Juglans Regia*, Z. officinale = *Zingiber officinale*, M. longifolia = *Mentha longifolia*, C. longa = *Curcuma longa*

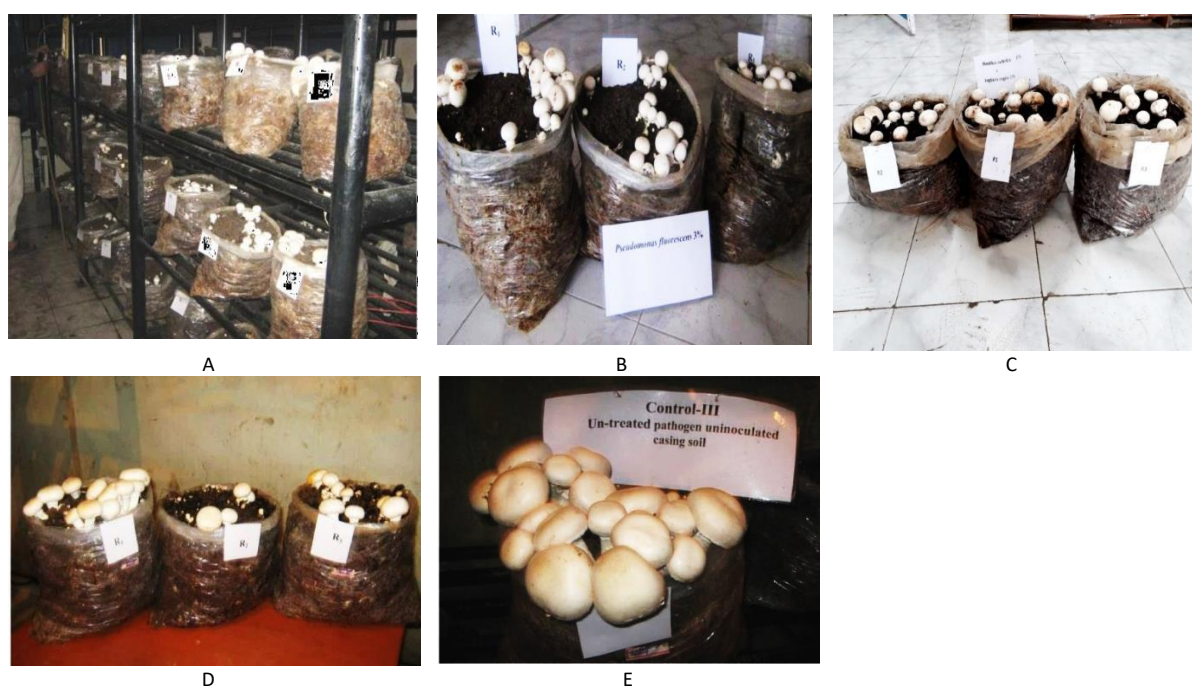

**Figure S3.** Evaluation of bioassay of bacterial antagonists and botanicals against the green mold disease of white button mushroom

A- Experimental layout

B, C, D- Integrated management components of botanicals and bacterial antagonists

E- Un-infested (Check-II)

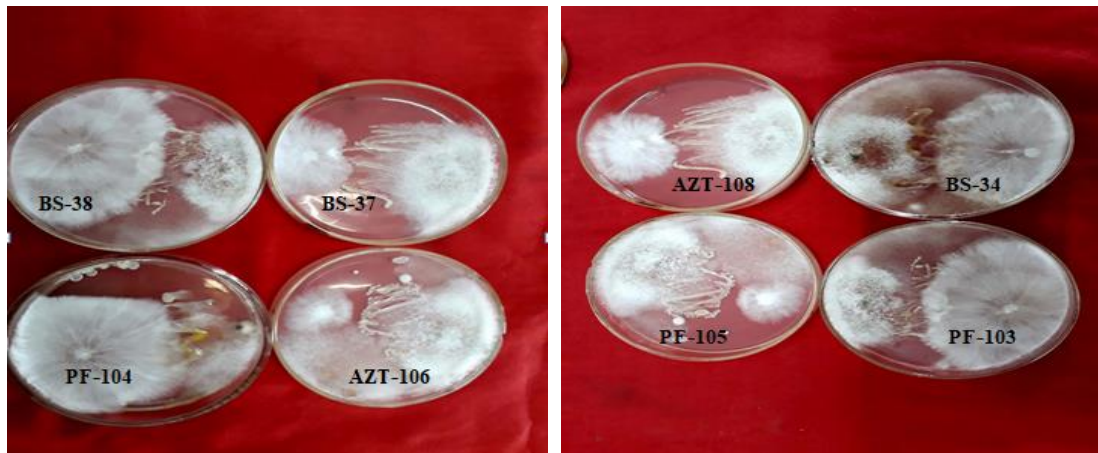

BS =*Bacillus subtilis*, PF =*Pseudomonas fluorescens*, AZT=*Azotobacter* spp.

**Figure S4:** *In vitro* evaluation of bacterial antagonists against the green mold pathogen (*T. harzianum*) and white button mushroom (*A. bisporus*)

**Table S1: Mean sum of squares of botanical extracts**

| Source of Variation                                                                          | Degree of Freedom | Mean Sum of square | Grand Mean | C.V.  |
|----------------------------------------------------------------------------------------------|-------------------|--------------------|------------|-------|
| Effect of Botanical extracts on severity (%) of green mould disease of white button mushroom |                   |                    |            |       |
| ENVIRONMENT-I                                                                                |                   |                    |            |       |
| Treatment                                                                                    | 9                 | 2.491*             | 2.968      | 0.15  |
| ENVIRONMENT-II                                                                               |                   |                    |            |       |
| Treatment                                                                                    | 9                 | 2.949*             | 2.759      | 0.20  |
| Pooled                                                                                       |                   |                    |            |       |
| Treatment                                                                                    | 9                 | 0.379*             | 2.863      | 0.21  |
| Environment                                                                                  | 1                 | 5.399*             |            |       |
| Interaction                                                                                  | 9                 | 0.409*             |            |       |
| Effect of Botanical extracts on number of fruit bodies                                       |                   |                    |            |       |
| Effect of Botanical extracts on diameter of pileus                                           |                   |                    |            |       |
| Treatment                                                                                    | 9                 | 670.23*            | 91.24      | 0.04  |
| Effect of Botanical extracts on fruit bodies weight                                          |                   |                    |            |       |
| Treatment                                                                                    | 9                 | 115.97*            | 11.09      | 0.19  |
| Effect of Botanical extracts on button yield                                                 |                   |                    |            |       |
| Treatment                                                                                    | 9                 | 20.86*             | 10.11      | 0.16  |
| Effect of Botanical extracts on weight of pileus                                             |                   |                    |            |       |
| Treatment                                                                                    | 9                 | 120.5*             | 8.32       | 0.30  |
| Treatment                                                                                    | 9                 | 0.326*             | 3.422      | 0.56  |
| Effect of Botanical extracts on weight of stipe                                              |                   |                    |            |       |
| Treatment                                                                                    | 9                 | 0.107*             | 4.464      | 0.44  |
| Effect of Botanical extracts on diameter of stipe                                            |                   |                    |            |       |
| Treatment                                                                                    | 9                 | 0.492*             | 1.262      | 1.58  |
| Effect of Botanical extracts on <i>Trichoderma harzianum</i>                                 |                   |                    |            |       |
| Botanical                                                                                    | 9                 | 459.51*            | 51.32      | 60.32 |
| Concentration                                                                                | 2                 | 45.71*             |            |       |
| Botanical × concentration                                                                    | 18                | 507.65*            |            |       |
| Effect of Botanical extracts on <i>Agaricus bisporus</i>                                     |                   |                    |            |       |
| Botanical                                                                                    | 9                 | 114.86*            | 51.32      | 60.32 |
| Concentration                                                                                | 2                 | 27.45*             |            |       |
| Botanical × concentration                                                                    | 18                | 132.41*            |            |       |

**Significance at 5%**

**TableS2: Mean sum of squares of bacterial antagonists**

| Source of Variation                                                                             | Degree of Freedom | Mean Sum of square | Grand Mean | C.V. |
|-------------------------------------------------------------------------------------------------|-------------------|--------------------|------------|------|
| Effect of Bacterial antagonists on severity (%) of green mould disease of white button mushroom |                   |                    |            |      |
| ENVIRONMENT-I                                                                                   |                   |                    |            |      |
| Treatment                                                                                       | 10                | 14.491*            | 12.688     | 0.15 |
| ENVIRONMENT-II                                                                                  |                   |                    |            |      |
| Treatment                                                                                       | 10                | 12.949*            | 10.473     | 0.20 |
| Pooled                                                                                          |                   |                    |            |      |
| Treatment                                                                                       | 10                | 0.379*             | 13.580     | 0.21 |
| Environment                                                                                     | 1                 | 5.399*             |            |      |
| Interaction                                                                                     | 10                | 0.409*             |            |      |
| Effect of Bacterial antagonists on number of fruit bodies                                       |                   |                    |            |      |
| Treatment                                                                                       | 10                | 119.759*           | 89.06      | 0.04 |
| Effect of Bacterial antagonists on fruit bodies weight                                          |                   |                    |            |      |
| Treatment                                                                                       | 10                | 52.606*            | 11.53      | 0.19 |
| Effect of Bacterial antagonists on button yield                                                 |                   |                    |            |      |
| Treatment                                                                                       | 10                | 20.86*             | 9.21       | 0.16 |
| Effect of Bacterial antagonists on weight of pileus                                             |                   |                    |            |      |
| Treatment                                                                                       | 10                | 1.232*             | 6.679      | 0.30 |
| Effect of Bacterial antagonists on diameter of pileus                                           |                   |                    |            |      |
| Treatment                                                                                       | 10                | 0.326*             | 3.525      | 0.56 |
| Effect of Bacterial antagonists on weight of stipe                                              |                   |                    |            |      |
| Treatment                                                                                       | 10                | 0.107*             | 4.440      | 0.44 |
| Effect of Bacterial antagonists on diameter of stipe                                            |                   |                    |            |      |
| Treatment                                                                                       | 10                | 0.492*             | 1.264      | 1.58 |
| Effect of Bacterial antagonists on <i>Trichoderma harzianum</i>                                 |                   |                    |            |      |
| Treatment                                                                                       | 9                 | 7.657*             | 90.96      | 3.6  |
| Effect of Bacterial antagonists on <i>Agaricus bisporus</i>                                     |                   |                    |            |      |
| Treatment                                                                                       | 9                 | 10813*             | 30.32      | 2.7  |

Significance at 5%

**Table S3.** *In vivo* effect of botanical extracts on quality parameters of white button mushroom (*Agaricus bisporus*)

| Treatments                      |      | Pileus weight<br>(g) | Pileus Diameter<br>(cm) | Weight of<br>stipe (g) | Diameter of stipe<br>(cm) |
|---------------------------------|------|----------------------|-------------------------|------------------------|---------------------------|
| <i>Juglans regia</i>            | 0.5% | 6.13 <sup>c</sup>    | 3.23 <sup>e</sup>       | 4.23 <sup>e</sup>      | 1.22 <sup>d</sup>         |
|                                 | 1.0% | 6.27 <sup>ab</sup>   | 3.47 <sup>c</sup>       | 4.37 <sup>cd</sup>     | 1.25 <sup>c</sup>         |
|                                 | 2.0% | 6.57 <sup>a</sup>    | 3.67 <sup>a</sup>       | 4.57 <sup>c</sup>      | 1.28 <sup>b</sup>         |
| Sub mean                        |      | 6.32                 | 3.45                    | 4.39                   | 1.25                      |
| <i>Allium sativum</i>           | 0.5% | 5.77 <sup>d</sup>    | 3.19 <sup>ef</sup>      | 4.34 <sup>cd</sup>     | 1.24 <sup>c</sup>         |
|                                 | 1.0% | 6.13 <sup>c</sup>    | 3.34 <sup>cd</sup>      | 4.47 <sup>c</sup>      | 1.28 <sup>b</sup>         |
|                                 | 2.0% | 6.51 <sup>a</sup>    | 3.47 <sup>c</sup>       | 4.68 <sup>ab</sup>     | 1.33 <sup>a</sup>         |
| Sub mean                        |      | 6.13                 | 3.33                    | 4.49                   | 1.28                      |
| <i>Curcuma longa</i>            | 0.5% | 5.91 <sup>d</sup>    | 3.24 <sup>e</sup>       | 4.53 <sup>c</sup>      | 1.22 <sup>d</sup>         |
|                                 | 1.0% | 6.13 <sup>c</sup>    | 3.43 <sup>c</sup>       | 4.74 <sup>ab</sup>     | 1.24 <sup>c</sup>         |
|                                 | 2.0% | 6.47 <sup>a</sup>    | 3.65 <sup>a</sup>       | 4.93 <sup>a</sup>      | 1.28 <sup>b</sup>         |
| Sub mean                        |      | 6.17                 | 3.44                    | 4.73                   | 1.24                      |
| Check I (infested-untreated)    |      | 5.63 <sup>e</sup>    | 3.37 <sup>cd</sup>      | 4.13 <sup>f</sup>      | 1.22 <sup>d</sup>         |
| Check II (uninfested-untreated) |      | 6.63 <sup>a</sup>    | 3.59 <sup>ab</sup>      | 4.12 <sup>f</sup>      | 1.22 <sup>d</sup>         |
| CD(p≤0.05)                      |      |                      |                         |                        |                           |
| Control v/s rest                |      | 0.0338               | 0.0339                  | 0.0875                 | 0.0338                    |
| Botanicals                      |      | 0.0199               | 0.0198                  | 0.0198                 | 0.0198                    |
| Concentration                   |      | 0.0199               | 0.0198                  | 0.0198                 | 0.0198                    |
| Botanical × Concentration       |      | 0.0345               | 0.0343                  | 0.0342                 | NS                        |

Mean of three replicates; means followed by same letters are not significantly different at p = 0.05

**Table S4.** *In vivo* effect of bacterial antagonists on quality parameters of white button mushroom (*Agaricus bisporus*)

| Treatments                          |      | Weight of pileus (g) | Diameter of pileus (cm) | Stipe weight (g)   | Stipe diameter (cm) |
|-------------------------------------|------|----------------------|-------------------------|--------------------|---------------------|
| <i>Psuedomonas flourescens</i> -104 | 0.5% | 6.47 <sup>e</sup>    | 3.47 <sup>d</sup>       | 4.33 <sup>e</sup>  | 1.23 <sup>d</sup>   |
|                                     | 1.0% | 6.57 <sup>cd</sup>   | 3.53 <sup>c</sup>       | 4.49 <sup>d</sup>  | 1.26 <sup>bc</sup>  |
|                                     | 2.0% | 7.13 <sup>b</sup>    | 3.67 <sup>ab</sup>      | 4.77 <sup>a</sup>  | 1.33 <sup>a</sup>   |
| Sub mean                            |      | 6.72                 | 3.55                    | 4.53               | 1.27                |
| <i>Bacillus subtilis</i> -38        | 0.5% | 6.51 <sup>b</sup>    | 3.41 <sup>d</sup>       | 4.27 <sup>e</sup>  | 1.25 <sup>d</sup>   |
|                                     | 1.0% | 6.55 <sup>cd</sup>   | 3.44 <sup>d</sup>       | 4.31 <sup>d</sup>  | 1.29 <sup>b</sup>   |
|                                     | 2.0% | 6.63 <sup>c</sup>    | 3.61 <sup>ab</sup>      | 4.69 <sup>ab</sup> | 1.34 <sup>a</sup>   |
| Sub mean                            |      | 6.56                 | 3.48                    | 4.42               | 1.29                |
| <i>Azotobacter</i> -108             | 0.5% | 6.43 <sup>e</sup>    | 3.33 <sup>e</sup>       | 4.33 <sup>e</sup>  | 1.21 <sup>de</sup>  |
|                                     | 1.0% | 6.47 <sup>e</sup>    | 3.37 <sup>e</sup>       | 4.63 <sup>c</sup>  | 1.25 <sup>d</sup>   |
|                                     | 2.0% | 6.55 <sup>b</sup>    | 3.47 <sup>d</sup>       | 4.73 <sup>a</sup>  | 1.33 <sup>a</sup>   |
| Sub mean                            |      | 6.48                 | 3.39                    | 4.56               | 1.26                |
| Check I (infested-untreated)        |      | 6.49 <sup>e</sup>    | 3.57 <sup>c</sup>       | 4.17 <sup>f</sup>  | 1.19 <sup>de</sup>  |
| Check II (uninfested-untreated)     |      | 7.67 <sup>a</sup>    | 3.91 <sup>a</sup>       | 4.13 <sup>f</sup>  | 1.23 <sup>d</sup>   |
| CD(p≤0.05)                          |      |                      |                         |                    |                     |
| Control v/s rest                    |      | 0.0333               | 0.0338                  | 0.0337             | 0.0338              |
| Biocontrol agent                    |      | 0.0195               | 0.0198                  | 0.0197             | 0.0198              |
| Concentration                       |      | 0.0195               | 0.0198                  | 0.0197             | 0.0198              |
| Biocontrol agent × Concentration    |      | 0.0339               | 0.0343                  | 0.0342             | NS                  |

Mean of three replicates; means followed by same letters are not significantly different at p = 0.05.
